# Supplementary material for: Isometamidium chloride and homidium chloride fail to cure mice infected with Ethiopian Trypanosoma evansi type A and B
Source: PubMed Central journal article supplement (PMC6152993; doi:10.1371/journal.pntd.0006790), 2018-09-12
Supplement: pntd.0006790.s002.pdf [file pntd.0006790.s002.pdf]

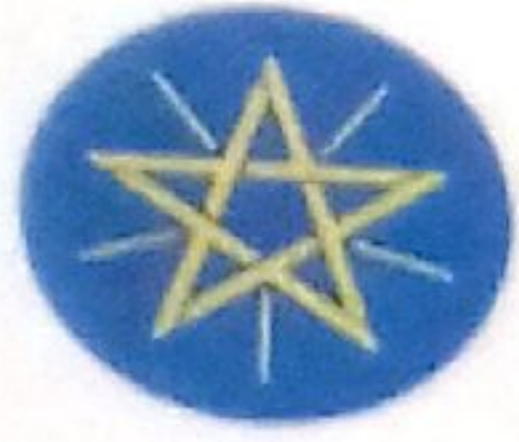

**ANIMAL PRODUCTS, VETERINARY  
DRUG AND FEED QUALITY  
ASSESSMENT CENTRE**

Tel:+251-114-71-79-64  
+251-114-71-72-58  
P.O.Box:31303

Addis Ababa, Ethiopia

**MEKELLE UNIVERSITY  
COLLEGE OF VETERINARY MEDICINE**

Tel:+251-344-40-13-89  
Fax:+251-344-40-15-95  
P.O.Box:2084

Mekelle, Ethiopia

**Certificate No.**  
QMS\_DQA\_444\_12/06/2018

**Drug physicochemical Certificate of Analysis (CoA)**

**QMS\_FORM\_014**

**1. SAMPLE INFORMATION**

|                        |                                                           |                      |                            |
|------------------------|-----------------------------------------------------------|----------------------|----------------------------|
| Sample submission date | May 31/2018                                               | Sampling method      | No information             |
| Sample ID              | QMS_DQA_444_2018                                          | Customer Ref. No     | CVM/19762/01               |
| Brand Name             | Veriben                                                   | Generic name         | Diminazene diaceturate     |
| Formulation            | Granules for injection                                    | Presentation         | Sachet of 23.6g            |
| Composition            | Diminazene diaceturate 10.5g &<br>Antipyrine 23.6g/sachet | Batch/Lot No.        | 830A1                      |
| Mfg. Date              | Mar. /2015                                                | Expiry Date          | Mar. /2019                 |
| Manufacturer           | Ceva Sante Animale                                        | For the account of   | Mekelle Universty Research |
| Submitted by           | Birehanu Hadush(Dr.)                                      | Method of analysis   | Manufacturer               |
| Analysis request date  | Jun. 01/2018                                              | Date report prepared | Jun. 12/2018               |

**2. PHYSICOCHEMICAL TEST RESULTS**

| Analysis date | Test parameters                                                    | Specification/acceptance limit                         | Observation                                          | Conclusion |
|---------------|--------------------------------------------------------------------|--------------------------------------------------------|------------------------------------------------------|------------|
| Jun. 11/2018  | Appearance                                                         | Yellow, granules powder                                | Yellow, granules powder                              | Complies   |
| Jun. 11/2018  | Identification by UV-Vis                                           | UV-Vis spectrum of standard<br>complies to the sample. | UV-Vis spectrum of standard complies<br>with sample. | Complies   |
| Jun. 11/2018  | Assay/API determination<br>by UV-Vis with Working<br>Standard (WS) |                                                        |                                                      | Complies   |
|               | Diminazene diaceturate                                             | 90 to 110%                                             | 94.71%                                               |            |
|               | Antipyrine(Phenazone)                                              | 90 to 110%                                             | 93.11%                                               |            |

**3. GENERAL CONCLUSION :** The tested sample meets the requirements as per Manufacturer method.

**4. REMARK:** This report and its test results relates only to the specific sample (s) identified herein and do not apply to any similar item that has not been tested.

**5. FINAL TEST RESULT AUTHORIZATION**

| Final test report | Name                                                                                | Signature | Date         |
|-------------------|-------------------------------------------------------------------------------------|-----------|--------------|
| Reviewed by       | Tadese Setegn                                                                       |           | Jun. 12/2018 |
| Assured by        | for/Director<br>Ayalew Zelelew Laboratory Quality Management<br>Control Directorate |           | Jun. 12/2018 |
| Authorized by     | <b>Belachew Tefera Zerihun (Dr)</b>                                                 |           | Jun. 12/2018 |

**CONTROLLED COPY**  
Animal products, Veterinary Drug &  
Feed Quality Assessment Centre  
Manager
