# Supplementary material for: Isometamidium chloride and homidium chloride fail to cure mice infected with Ethiopian Trypanosoma evansi type A and B
Source: PubMed Central journal article supplement (PMC6152993; doi:10.1371/journal.pntd.0006790), 2018-09-12
Supplement: pntd.0006790.s003.pdf [file pntd.0006790.s003.pdf]

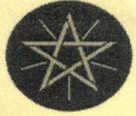

ANIMAL PRODUCTS, VETERINARY DRUG  
AND FEED QUALITY ASSESSMENT  
CENTRE

Tel: + 251-114-71-79-64 / 011-4-71-72-58  
P.O.Box: 31303  
Addis Ababa, Ethiopia

MEKELLE UNIVERSITY  
COLLEGE OF VETERINARY MEDICINE

Tel: +251-344-40-13-89  
Fax: +251-344-40-15-95  
P.O. Box : 2084  
Mekelle, Ethiopia

Certificate No.  
QMS\_DQA\_447\_12/06/2018

Drug physicochemical Certificate of Analysis (CoA)

QMS\_FORM\_014

1. SAMPLE INFORMATION

|                        |                                                                       |                      |                             |
|------------------------|-----------------------------------------------------------------------|----------------------|-----------------------------|
| Sample submission date | May 31/2018                                                           | Sampling method      | Random                      |
| Sample ID              | QMS_DQA_447_2018                                                      | Customer Ref. No     | CVM/19762/01                |
| Brand Name             | SEQUZENE                                                              | Generic name         | Diminazene diaceturate      |
| Formulation            | Granules for injection                                                | Presentation         | Sachet of 2.36g             |
| Composition            | Diminazene diaceturate 1.05g &<br>Phenazone (Antipyrene) 1.31g/sachet | Batch/Lot No.        | GR/15014/01                 |
| Mfg. Date              | Sep. 2015                                                             | Expiry Date          | Apr. /2020                  |
| Manufacturer           | Alivira Animal Health Limited                                         | For the account of   | Mekelle University Research |
| Submitted by           | Birehanu Hadush (Dr)                                                  | Method of analysis   | Manufacturer                |
| Analysis request date  | Jun 01/2018                                                           | Date report prepared | Jun. 12/2018                |

2. PHYSICOCHEMICAL TEST RESULTS

| Analysis date | Test parameters                                              | Specification/acceptance limit                      | Observation                                       | Conclusion |
|---------------|--------------------------------------------------------------|-----------------------------------------------------|---------------------------------------------------|------------|
| Jun. 11/2018  | Appearance                                                   | Yellow, granule powder                              | Yellow, granules powder                           | Complies   |
| Jun. 11/2018  | Identification by UV-Vis                                     | UV-Vis spectrum of standard complies to the sample. | UV-Vis spectrum of standard complies with sample. | Complies   |
| Jun. 11/2018  | Assay/API determination by UV-Vis with working standard (WS) |                                                     |                                                   |            |
|               | Diminazene diaceturate                                       | 90 to 110%                                          | 95.21%                                            | Complies   |
|               | Antipyrene (phenazone)                                       | 90 to 110%                                          | 97.61%                                            |            |

1. **GENERAL CONCLUSION:** The tested sample meets the requirements as per Manufacturer Method.

2. **REMARK:** the report and its test results relates only to the specific sample(s) identified herein and onot apply to any similar item that has not been tested.

3. FINAL TEST RESULT AUTHORIZATION

| Final test report | Name                                                                                                                                           | Signature | Date        |
|-------------------|------------------------------------------------------------------------------------------------------------------------------------------------|-----------|-------------|
| Reviewed by       | Tadese Setegn                                                                                                                                  |           | Jun 12/2018 |
| Assured by        | Zerihun Abegaz Yassin (Dr)<br>Director<br>Laboratory Quality Management<br>Control Directorate                                                 |           | Jun 12/2018 |
| Authorized by     | Belachew Tefera Zerihun (Dr)<br>APVD-FQAC Quality Assurance<br>Manager<br>Animal products, Veterinary Drug &<br>Feed Quality Assessment Centre |           | Jun 12/2018 |
