# Supplementary material for: Isometamidium chloride and homidium chloride fail to cure mice infected with Ethiopian Trypanosoma evansi type A and B
Source: PubMed Central journal article supplement (PMC6152993; doi:10.1371/journal.pntd.0006790), 2018-09-12
Supplement: pntd.0006790.s004.pdf [file pntd.0006790.s004.pdf]

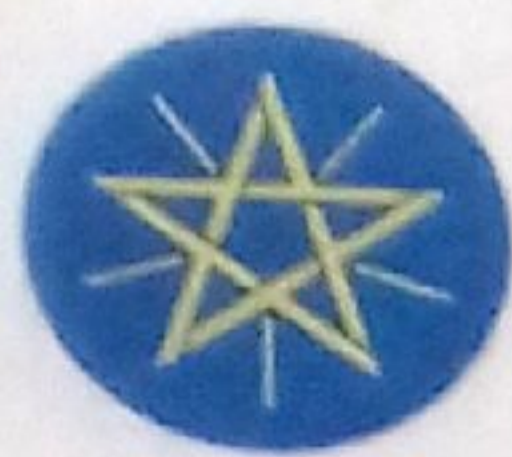

**ANIMAL PRODUCTS, VETERINARY  
DRUG AND FEED QUALITY  
ASSESSMENT CENTRE**

Tel:+251-114-71-79-64  
+251-114-71-72-58  
P.O.Box:31303

Addis Ababa, Ethiopia

**MEKELLE UNIVERSITY  
COLLEGE OF VETERINARY MEDICINE**

Tel:+251-344-40-13-89  
Fax:+251-344-40-15-95  
P.O.Box:2084

Mekelle, Ethiopia

**Certificate No.**  
QMS\_DQA\_445\_12/06/2018

**QMS\_FORM\_014**

**Drug physicochemical Certificate of Analysis (CoA)**

**1. SAMPLE INFORMATION**

|                        |                                                |                      |                                      |
|------------------------|------------------------------------------------|----------------------|--------------------------------------|
| Sample submission date | May 31/2018                                    | Sampling method      | No information                       |
| Sample ID              | QMS_DQA_445_2018                               | Customer Ref. No     | CVM/19762/01                         |
| Brand Name             | Veridium                                       | Generic name         | Isometamidium chloride hydrochloride |
| Formulation            | Powder for solution for injection              | Presentation         | Sachet of 1g                         |
| Composition            | Isometamidium chloride hydrochloride 1g/sachet | Batch/Lot No.        | 245A1                                |
| Mfg. Date              | Jan. /2015                                     | Expiry Date          | Jan. /2020                           |
| Manufacturer           | Ceva Sante Animale                             | For the account of   | Mekelle Universty Research           |
| Submitted by           | Birehanu Hadush(Dr.)                           | Method of analysis   | Manufacturer                         |
| Analysis request date  | Jun. 06/2018                                   | Date report prepared | Jun. 12/2018                         |

**2. PHYSICOCHEMICAL TEST RESULTS**

| Analysis date | Test parameters                                                                      | Specification/acceptance limit                                        | Observation                                                           | Conclusion      |
|---------------|--------------------------------------------------------------------------------------|-----------------------------------------------------------------------|-----------------------------------------------------------------------|-----------------|
| Jun. 07/2018  | Physical description                                                                 | Dark red crystalline powder .                                         | Dark red crystalline powder .                                         | <b>Complies</b> |
| Jun. 07/2018  | Identification test                                                                  | Sample and Reference Material (RM) retention time should be the same. | Sample retention time is the same as that of Reference Material (RM). | <b>Complies</b> |
| Jun. 07/2018  | Assay/API content<br>Isometamidium chloride hydrochloride with Working Standard (WS) | 90% to 110% labeled amount                                            | 99.80%                                                                | <b>Complies</b> |

**3. GENERAL CONCLUSION :** The tested sample meets the requirements as per Manufacturer method.

**4. REMARK:** This report and its test results relates only to the specific sample (s) identified herein and do not apply to any similar item that has not been tested.

**5. FINAL TEST RESULT AUTHORIZATION**

| Final test report | Name                                                                                   | Signature | Date         |
|-------------------|----------------------------------------------------------------------------------------|-----------|--------------|
| Reviewed by       | Tadese Setegn                                                                          |           | Jun. 12/2018 |
| Assured by        | Ayalew Zelelew<br>for Director<br>Laboratory Quality Management<br>Control Directorate |           | Jun. 12/2018 |
| Authorized by     | Belachew Tefera Zerihun (Dr)<br>Manager                                                |           | Jun. 12/2018 |

Animal products, Veterinary Drug &  
Feed Quality Assessment Centre

**CONTROLLED COPY**
