# Supplementary material for: Isometamidium chloride and homidium chloride fail to cure mice infected with Ethiopian Trypanosoma evansi type A and B
Source: PubMed Central journal article supplement (PMC6152993; doi:10.1371/journal.pntd.0006790), 2018-09-12
Supplement: pntd.0006790.s005.pdf [file pntd.0006790.s005.pdf]

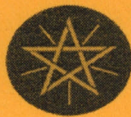

ANIMAL PRODUCTS, VETERINARY DRUG  
AND FEED QUALITY ASSESSMENT  
CENTRE

Tel: + 251-114-71-79-64 / 011-4-71-72-58  
P.O.Box: 31303  
Addis Ababa, Ethiopia

MEKELLE UNIVERSITY  
COLLEGE OF VETERINARY MEDICINE

Tel: + 251-034-44-013-89  
P.O.Box: 2084  
Mekelle, Ethiopia

Certificate No.  
QMS\_DQA\_448\_04/07/2018

**DRUG PHYSICOCHEMICAL TEST RESULT REPORTING FORM**

QMS\_FORM\_014

**1. SAMPLE INFORMATION**

|                        |                                 |                      |                                   |
|------------------------|---------------------------------|----------------------|-----------------------------------|
| Sample submission date | May 31/2018                     | Sampling method      | Random                            |
| Sample ID              | QMS_DQA_448_2018                | Customer Ref. No     | CVM/19762/01                      |
| Brand Name             | Bovidium                        | Generic name         | Homidium chloride                 |
| Formulation            | Tablet for injection            | Presentation         | Tablet of 250mg                   |
| Composition            | Homidium chloride 250mg/ tablet | Batch/Lot No.        | 20311                             |
| Mfg. Date              | Jul. /2013                      | Expiry Date          | Jun. /2018                        |
| Manufacturer           | KELA N.V.                       | For the account of   | MU / Shire endaslase vet pharmacy |
| Submitted by           | Mekelle University              | Method of analysis   | Manufacturer                      |
| Analysis request date  | Jun 27/2018                     | Date report prepared | 04/07/2018                        |

**2. PHYSICOCHEMICAL TEST RESULTS**

| Analysis date | Test parameters           | Specification/acceptance limit                                      | Observation                                                         | Conclusion |
|---------------|---------------------------|---------------------------------------------------------------------|---------------------------------------------------------------------|------------|
| 03/07/2018    | Appearance                | Reddish purple, plain, biconvex round tablet                        | Reddish purple, plain, biconvex round tablet.                       | Complies   |
| 03/07/2018    | Identification test by IR | The spectrum of the tablet complies with the IR reference spectrum. | The spectrum of the tablet complies with the IR reference spectrum. | Complies   |
| 03/07/2018    | Assay<br>Homidium Bromide | 90.0-110.0%<br>225.0-275.0 mg/tablet                                | 96.09%<br>240.23 mg/tab                                             | Complies   |

**3. GENERAL CONCLUSION:** The tested sample meets the requirements as per Manufacturer Methods.

**4. REMARK:** The test result is based on the test parameters carried out on the samples submitted to the lab by M.U.

**5. FINAL TEST RESULT AUTHORIZATION**

| Final test report | Name                                                                                                            | Signature | Date       |
|-------------------|-----------------------------------------------------------------------------------------------------------------|-----------|------------|
| Reviewed by       | Tadese Setegn                                                                                                   |           | 04/07/2018 |
| Assured by        | Zerihun Abegaz Yassin (Dr)<br>Director<br>Laboratory Quality Management<br>Control Directorate                  |           | 04/07/2018 |
| Authorized by     | Belachew Tefera Zerihun (Dr)<br>Manager<br>Animal products, Veterinary Drug &<br>Feed Quality Assessment Centre |           | 04/07/2018 |

**CONTROLLED COPY**
